# Supplementary material for: Comparing blends and blocks: Synthesis of partially fluorinated diblock polythiophene copolymers to investigate the thermal stability of optical and morphological properties
Source: publisher site journal article supplement (doi:10.3762/bjoc.12.205), 2016-10-10
Supplement: Additional file 1 [file 1860-5397-12-205-S1.pdf]

## Supporting Information

for

# Comparing blends and blocks: Synthesis of partially fluorinated diblock polythiophene copolymers to investigate the thermal stability of optical and morphological properties

Pierre Boufflet,<sup>1</sup> Sebastian Wood,<sup>2</sup> Jessica Wade,<sup>2</sup> Zhuping Fei,<sup>1</sup> Ji-Seon Kim,<sup>2</sup> and Martin Heeney\*<sup>1</sup>

Address: <sup>1</sup>Department of Chemistry and Centre for Plastic Electronics, Imperial College London, Exhibition Rd, London, SW7 2AZ, U.K. and

<sup>2</sup>Department of Physics and Centre for Plastic Electronics, Imperial College London, London, SW7 2AZ, U.K.

Email: Martin Heeney – [m.heeney@imperial.ac.uk](mailto:m.heeney@imperial.ac.uk)

\* Corresponding author

## Additional spectra

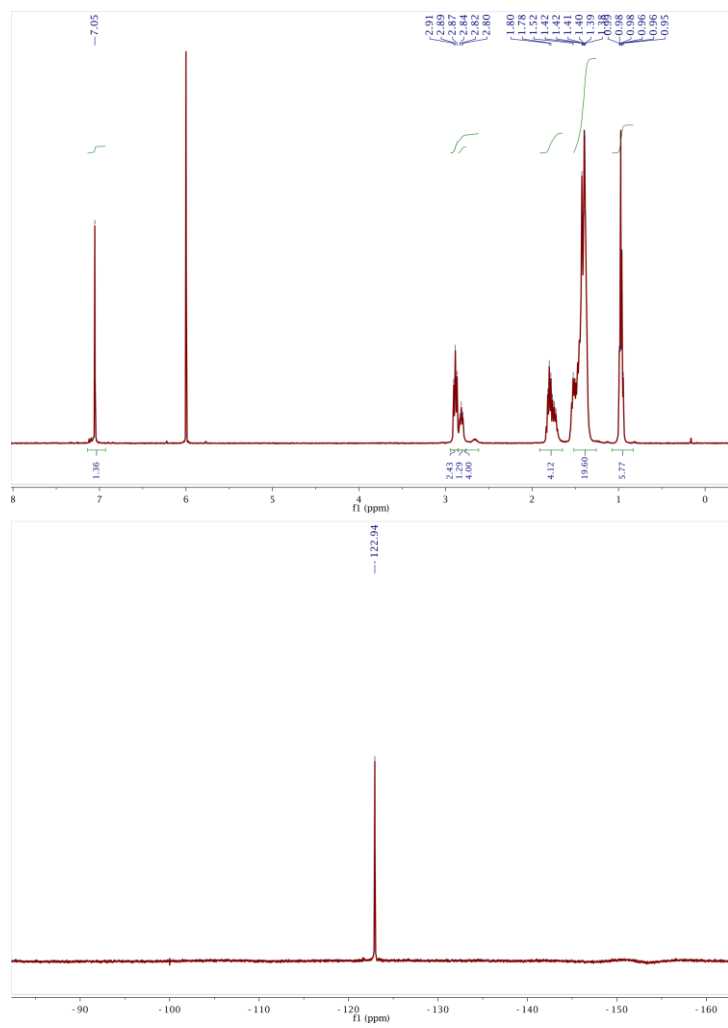

**Figure S1:** NMR P3OT-*b*-F-P3OT 2:1.

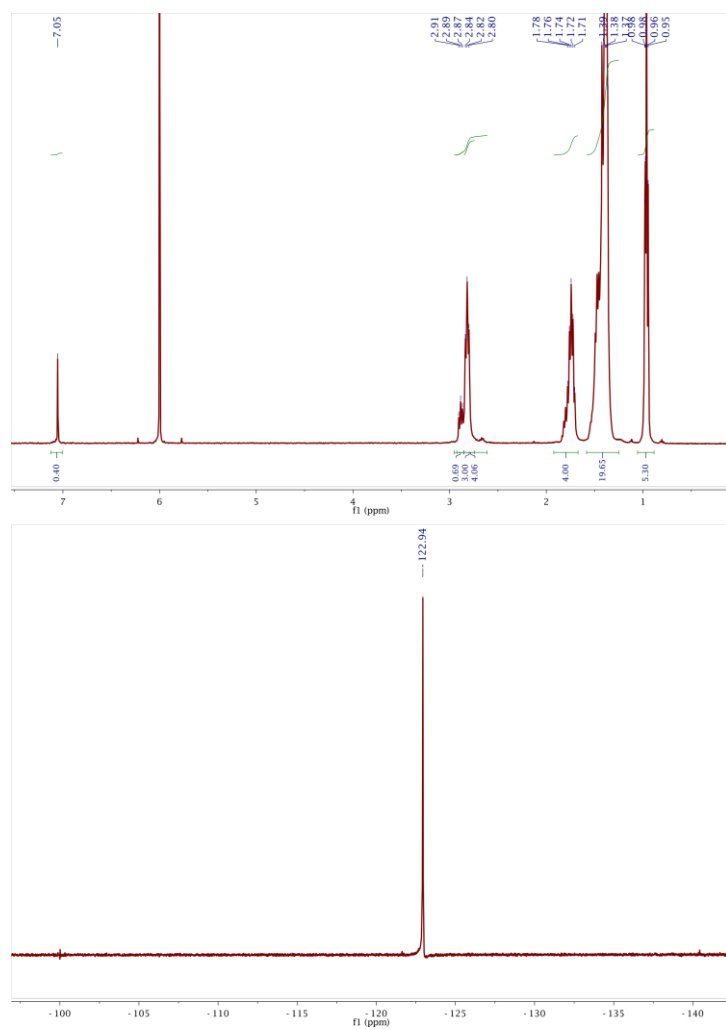

**Figure S2:** NMR P3OT-*b*-F-P3OT 1:4.

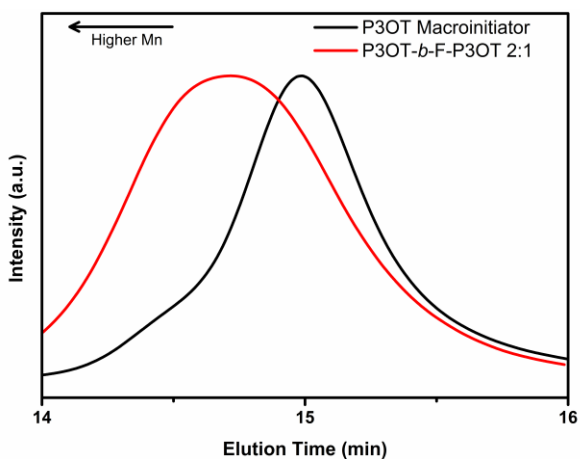

**Figure S3:** Gel Permeation Chromatography trace during the synthesis of P3OT-*b*-F-P3OT 2:1.

The black trace is the P3OT macroinitiator sample taken prior to the addition of 4, and the red trace is P3OT-*b*-F-P3OT 2:1 after Soxhlet purification.

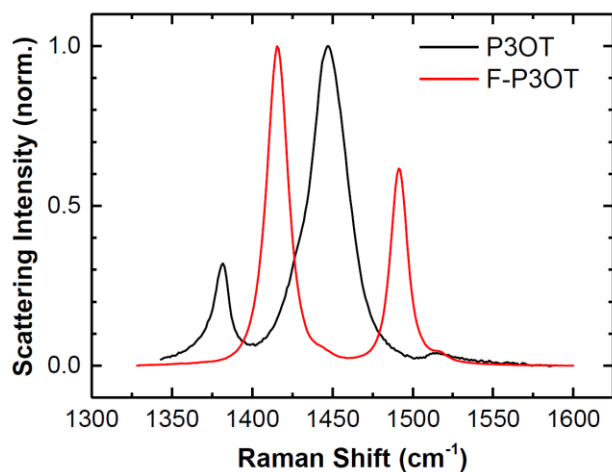

**Figure S4:** Room temperature Raman spectra of P3OT and F-P3OT homopolymers.

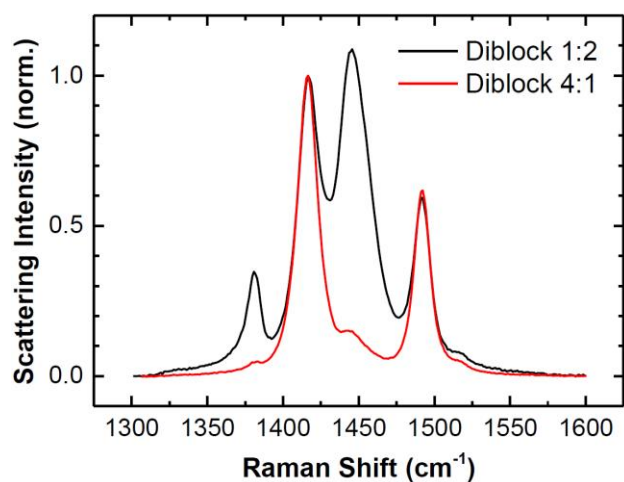

**Figure S5:** Room temperature Raman spectra of P3OT-*b*-F-P3OT 2:1 and P3OT-*b*-F-P3OT 1:4.

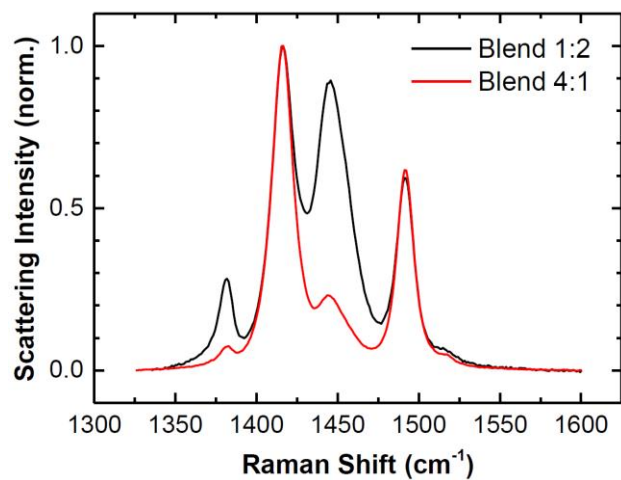

**Figure S6:** Room temperature Raman spectra of blends of P3OT and F-P3OT in 2:1 and 1:4 ratios.

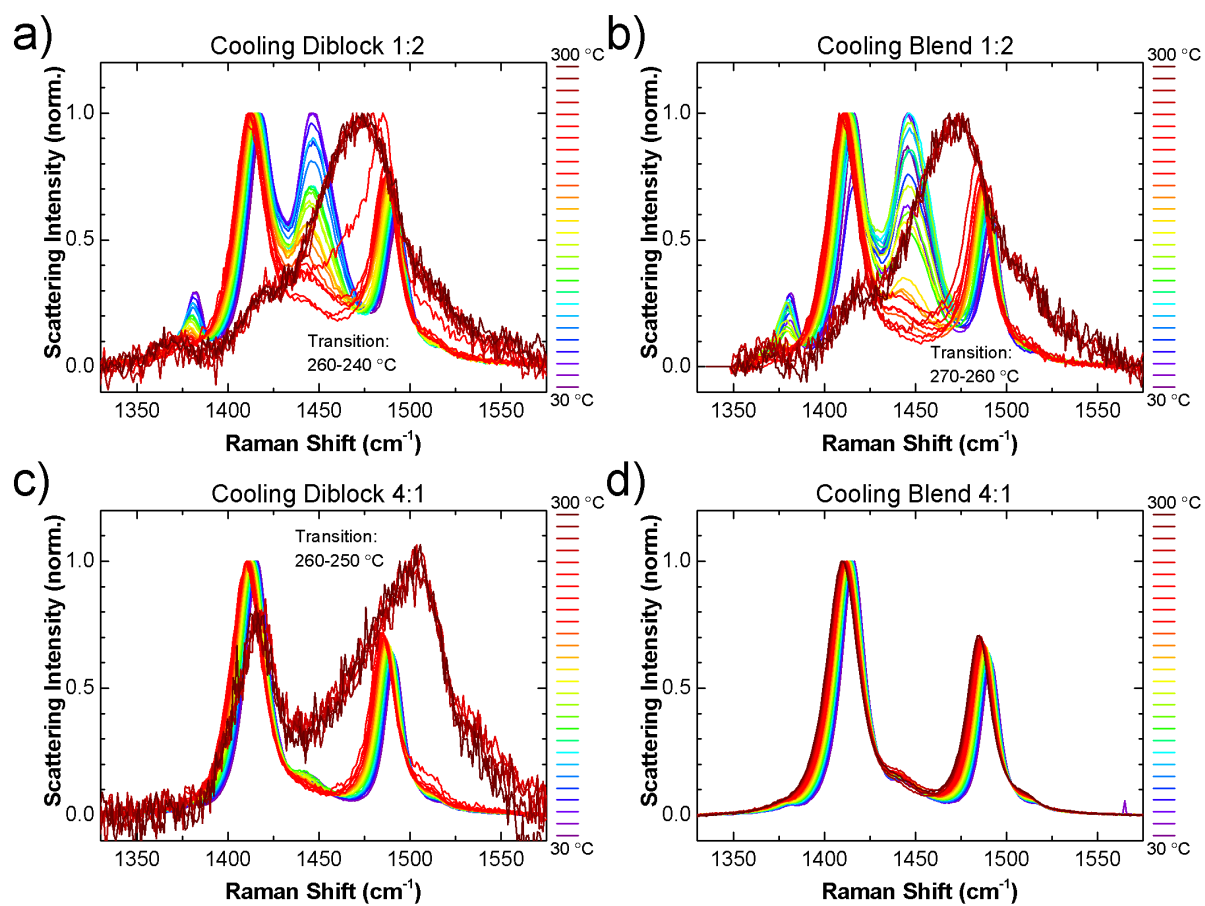

**Figure S7:** Temperature dependent Raman spectra measured during cooling thin film samples from 300 °C to 30 °C, (*cf.* heating data in Figure 6) showing the main C-C and C=C stretches of a) P3OT-*b*-F-P3OT 2:1, b) P3OT/F-P3OT blend in a 2:1 ratio, c) P3OT-*b*-F-P3OT 4:1, and d) P3OT/F-P3OT blend in a 4:1 ratio.
